# Supplementary material for: Identification of Aging and Young Subtypes for Predicting Colorectal Cancer Prognosis and Immunotherapy Responses
Source: MDPI journal article supplement (doi:10.3390/ijms24021516), 2023-01-12
Supplement: s1 [file s1]

# **Identification of Aging and Young Subtypes for Predicting Colorectal Cancer Prognosis and Immunotherapy Responses**

Lulu Tan<sup>1,†</sup>, Xiakeerzhati Xiaohalati<sup>2,†</sup>, Feng Liu<sup>3</sup>, Jia Liu<sup>3</sup>, Haoyu Fu<sup>1</sup>, Yang Zhang<sup>2</sup>,  
Jinbo Gao<sup>1</sup>, Kaixiong Tao<sup>1</sup>, Guobin Wang<sup>1</sup>, Lin Wang<sup>2,\*</sup>, Zheng Wang<sup>1,\*</sup>

<sup>1</sup>*Department of Gastrointestinal Surgery, Union Hospital, Tongji Medical College, Huazhong University of Science and Technology, Wuhan, 430022, China*

<sup>2</sup>*Department of Clinical Laboratory, Union Hospital, Tongji Medical College, Huazhong University of Science and Technology, Wuhan, 430022, China*

<sup>3</sup>*Research Center for Tissue Engineering and Regenerative Medicine, Union Hospital, Tongji Medical College, Huazhong University of Science and Technology, Wuhan, 430022, China*

*Corresponding author.*

Lin Wang lin\_wang@hust.edu.cn Department of Clinical Laboratory, Union Hospital, Tongji Medical College, Huazhong University of Science and Technology, Wuhan, 430022, China

Zheng Wang zhengwang@hust.edu.cn Department of Gastrointestinal Surgery, Union Hospital, Tongji Medical College, Huazhong University of Science and Technology, Wuhan, 430022, China

<sup>†</sup> These authors contributed equally to this work.

**KEYWORDS:** colorectal cancer; aging; unsupervised clustering; tumor microenvironment; prognosis

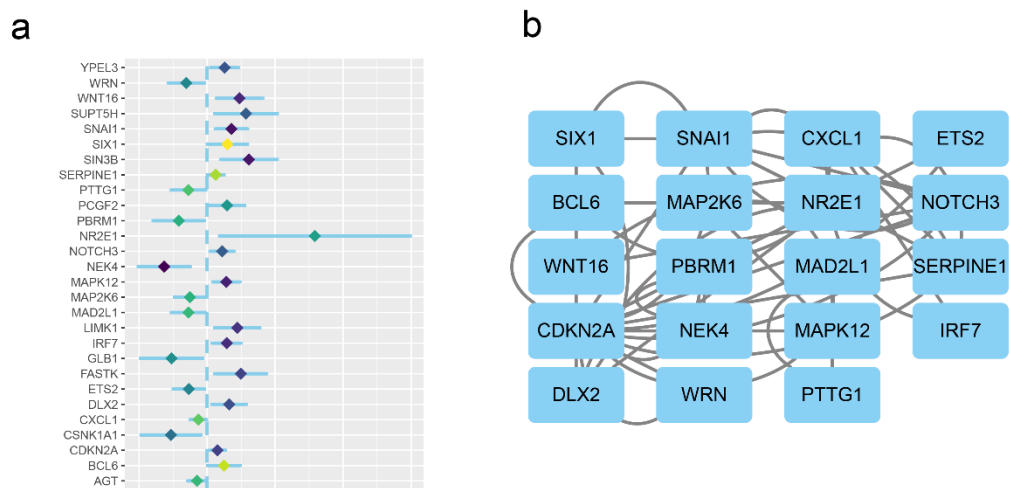

**Figure S1.** Twenty-eight aging-related genes were associated with CRC prognosis.

(a) Univariate cox regression analyses of 28 aging-related genes. (b) PPI networks of aging-related genes.

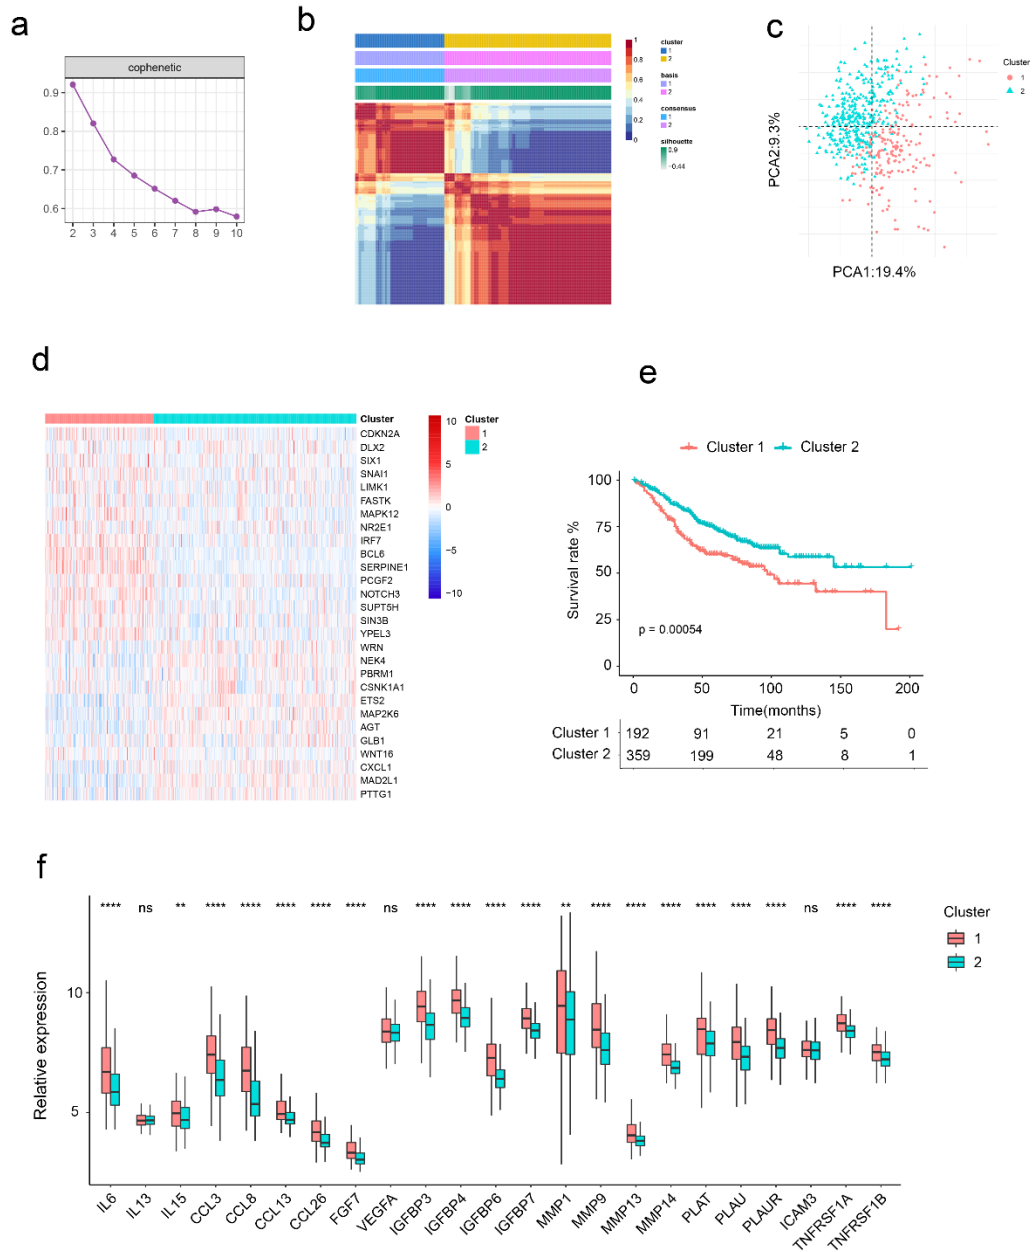

**Figure S2.** Unsupervised clustering of aging-related genes in the validation set. **(a,b)** The validation set (GSE39582) was clustered by NMF method. **(c)** Visualization of NMF results using PCA. **(d)** Heatmap of 28 aging-related genes. **(e)** Kaplan–Meier curves for OS of GSE39582 with the aging classes. **(f)** Gene expression of the SASP gene sets between two distinct clusters in GSE39582. \*\*,  $P < 0.01$ ; \*\*\*\*,  $P < 0.0001$ ; ns, not significant.

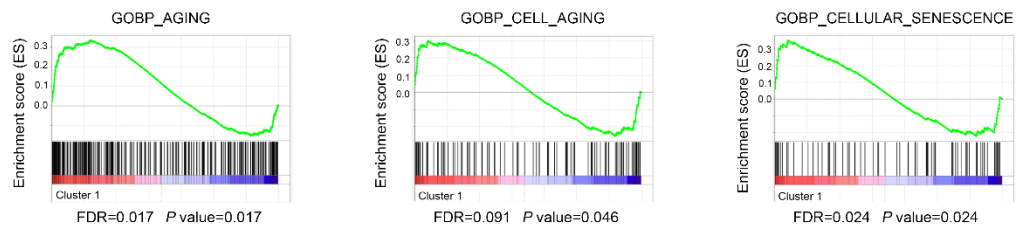

**Figure S3.** GSEA analyzed the aging biological pathways of two aging subtypes.

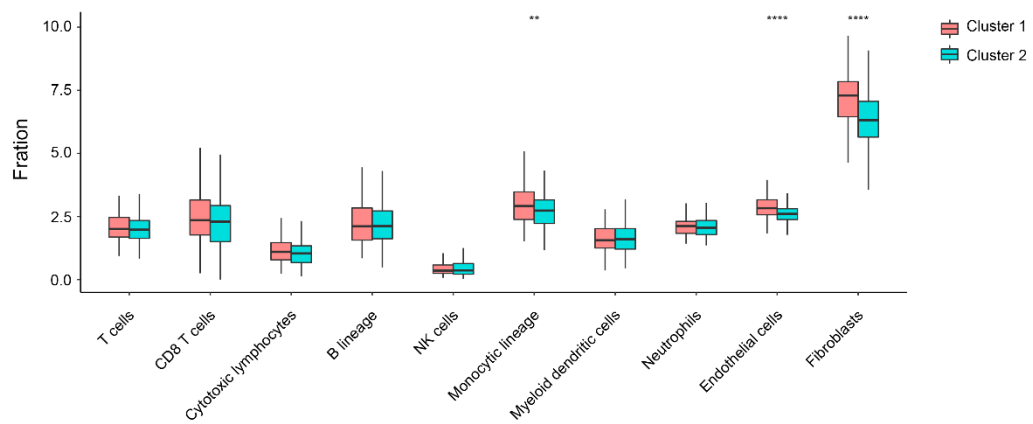

**Figure S4.** Box plots of fractions of 10 immune cells by MCP-counter algorithm. \*\*,  $P < 0.01$ ; \*\*\*\*,  $P < 0.0001$ .

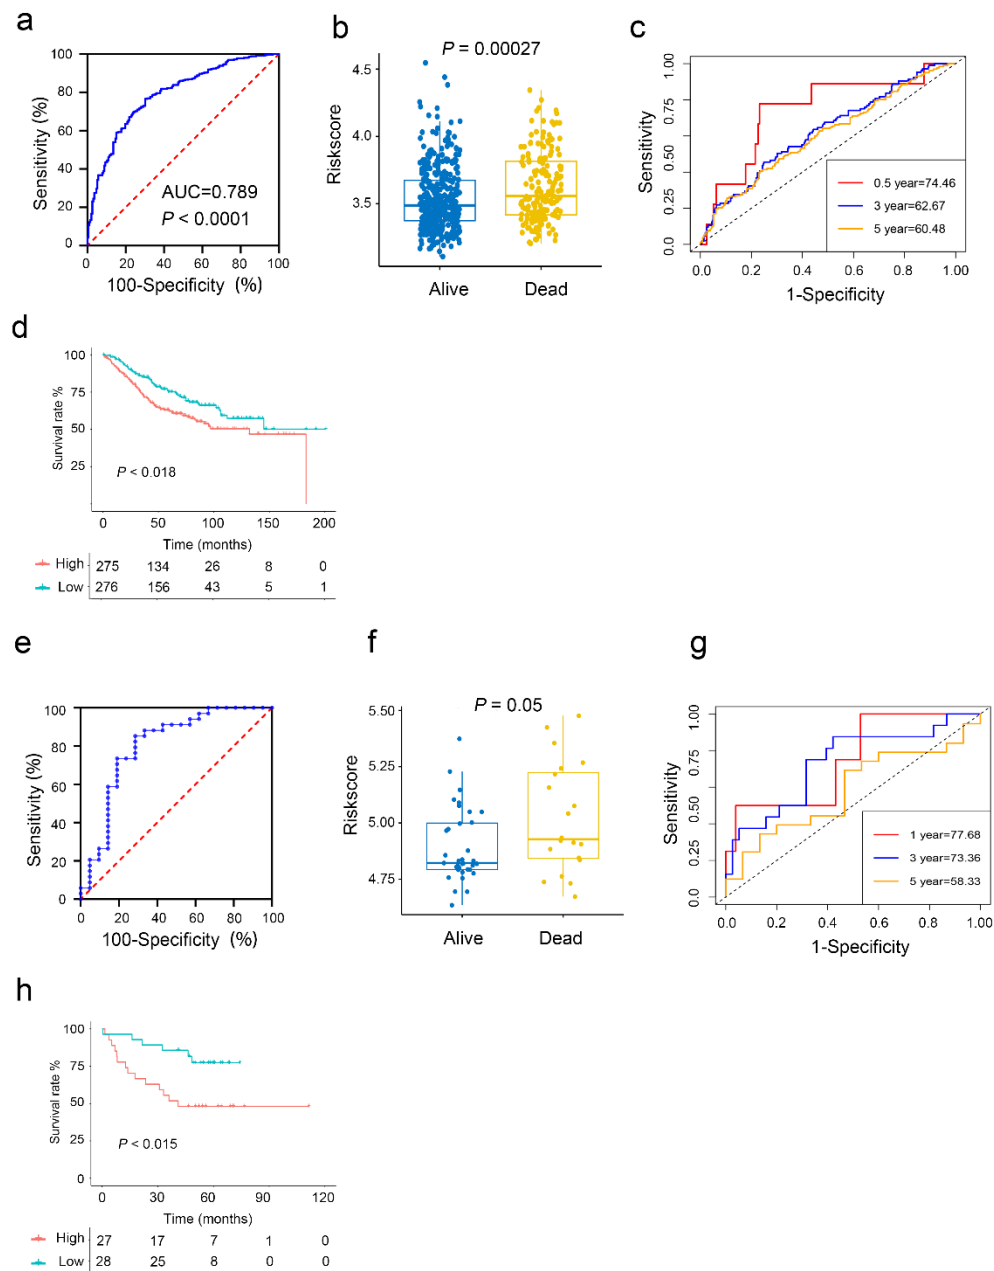

**Figure S5.** Validation of aging-related risk score. **(a,e)** ROC curves for predicting aging subtypes by risk score in the validation sets (GSE39582, GSE17437). **(b,f)** Comparison of risk scores in survival and death patients. **(c,g)** ROC curves for predicting 3-, and 5-year OS by risk score in the validation sets (GSE39582, GSE17437). **(d,h)** The association of high-risk score with prognosis of CRC patients.

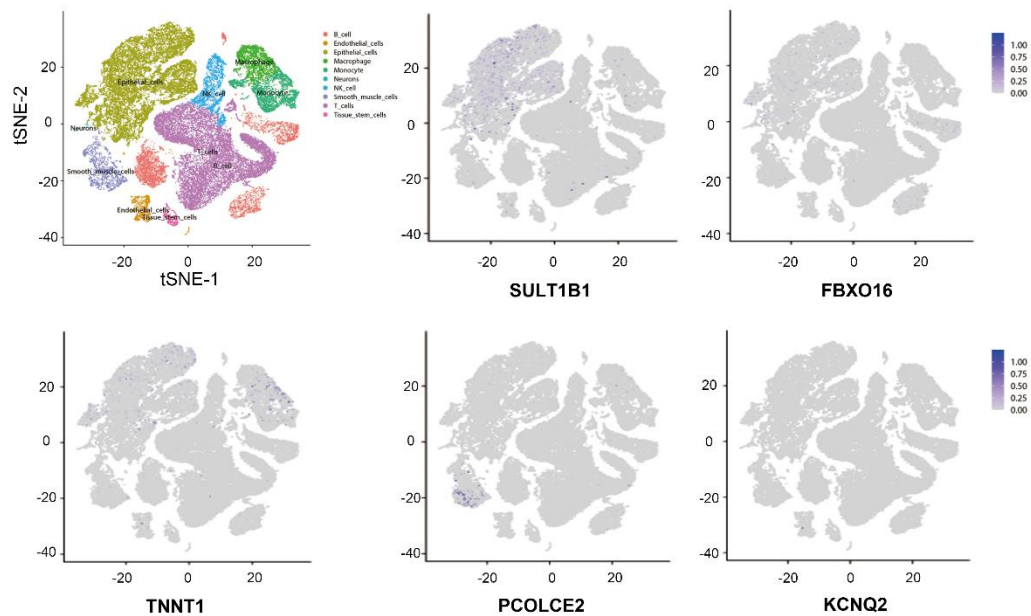

**Figure S6.** t-SNE plot showed single-cell transcriptomic profiling of SUL1B1, FBXO16, TNNT1, PCOLCE2 and KCNQ2 from CRC.

**Table. S1.** List of the primer sequences

| Primer name     | Primer sequence (from 5' to 3') |
|-----------------|---------------------------------|
| KCNQ2 Forward   | ATCCTGGAAATCGTGACTATCGT         |
| KCNQ2 Reverse   | TTCCGGGCAAACCTTGAGCC            |
| NOG Forward     | CCATGCCGAGCGAGATCAAA            |
| NOG Reverse     | TCGGAAATGATGGGGTACTGG           |
| PCOLCE2 Forward | TACTTGGAATACACAGTTCCCG          |
| PCOLCE2 Reverse | CGGCACAGGTTGTCACTCTC            |
| NKAIN4 Forward  | GTCGTCCTCTGCGCTTTTCA            |
| NKAIN4 Reverse  | CCGAAGAGTCCCAGGATGAC            |
| HOXC6 Forward   | ACAGACCTCAATCGCTCAGGA           |
| HOXC6 Reverse   | AGGGGTAAATCTGGATACTGGC          |
| HOTAIR Forward  | CAGTGGGGAACTCTGACTCG            |
| HOTAIR Reverse  | GTGCCTGGTGCTCTCTTACC            |
| HOXC8 Forward   | ACCGCCTATTACGACTGC              |
| HOXC8 Reverse   | TGCTGGTAGCCTGAGTTGGA            |
| PANX2 Forward   | TTCGCCGCCATCATGTACG             |
| PANX2 Reverse   | GGTAACAGTTGTCGATCTCCTG          |
| HOXC11 Forward  | ATGTTTAACTCGGTCAACCTGG          |
| HOXC11 Reverse  | GCATGTAGTAAGTGCAACTGGG          |

|                 |                         |
|-----------------|-------------------------|
| TNNT1 Forward   | ACATTTTCGAGCAGCGGAAGA   |
| TNNT1 Reverse   | CTTCTCCTCCGCCAGCTTAG    |
| MUC16 Forward   | CCAGTCCTACATCTTCGGTTGT  |
| MUC16 Reverse   | AGGGTAGTTCCTAGAGGGAGTT  |
| CLCA1 Forward   | ACAACAATGGCTATGAAGGCA   |
| CLCA1 Reverse   | GGTCTCAAGTTTTGGTCTCACAT |
| SULT1B1 Forward | TTGAACAGTTCCATAGCAGACC  |
| SULT1B1 Reverse | CAGGGAGAGTCATTTCCAACATT |
| FBXO16 Forward  | AGGATGGATTTGTAATCGCTGAC |
| FBXO16 Reverse  | CGAAAAGCTGATAAAGGGGACT  |
| P21 Forward     | TGTCCGTCAGAACCCATGC     |
| P21 Reverse     | AAAGTCGAAGTTCCATCGCTC   |
| MMP-1 Forward   | AAAATTACACGCCAGATTTGCC  |
| MMP-1 Reverse   | GGTGTGACATTACTCCAGAGTTG |
| CCL2 Forward    | CAGCCAGATGCAATCAATGCC   |
| CCL2 Reverse    | TGGAATCCTGAACCCACTTCT   |
| LMNB1 Forward   | GAAAAAGACAACCTCTCGTCGCA |
| LMNB1 Reverse   | GTAAGCACTGATTTCCATGTCCA |
| GAPDH Forward   | TGCACCACCAACTGCTTAGC    |
| GAPDH Reverse   | GGCATGGACTGTGGTCATGAG   |

---
